# Supplementary material for: Digital Health Information Systems in the Member States of the Commonwealth of Independent States: Status and Prospects
Source: MDPI journal article supplement (doi:10.3390/digital3030013), 2023-07-14
Supplement: s1 [file s1]

## Study Instrument

### Part 1 – Operation of eHealth

1. Does your country have a national eHealth policy or strategy?

☐ Yes

☐ No (go to question 3)

☐ I don't know (go to question 3)

2. Please attach a copy or provide a link to your country's most recent eHealth policy or strategy to be included in the GOe Global Directory of eHealth Strategies

Attachment: \_\_\_\_\_ or link \_\_\_\_\_.

3. Has the country identified a state body (organization) responsible for quality control of medical care using IT, safety and reliability of using IT in healthcare?

☐ Yes (please indicate the name of the state body (organization)\_\_\_\_\_)

☐ No

☐ I don't know

4. Does the country have a national HIS?

☐ Yes (go to question 6)

☐ No

5. Is a national HIS being developed or planned for development in the near future (1-3 years) in the country?

☐ Yes (please indicate the approximate date for putting HIS into operation \_\_\_\_)

☐ No (go to question 8)

6. Does the national HIS of the country support the Russian language (is it supposed)?

☐ Yes

☐ No

---

7. Does the national HIS of a country interact with the national satellite of another country?

- ☐ Yes (please indicate the name of another country \_\_\_\_\_)
- ☐ No, but is planned (please indicate the name of another count \_\_\_\_\_)
- ☐ No

8. Sources of financing for eHealth:

- ☐ Government funding
- ☐ Private or commercial funding
- ☐ Donors / non-government funding
- ☐ Public private partnership
- ☐ Other. Please comment \_\_\_\_\_.

9. If there are additional comments on any of the topics covered in this section, please add them below:

---

---

---

## **Part 2 – Electronic Medical Records/Electronic Health Records**

10. Does the country have regulations governing the use of EMR/EHR, including on a national scale?

- ☐ Yes
- ☐ No
- ☐ I don't know

11. In what year EMR/EHR were used for the first time? Please indicate the year  
\_\_\_\_\_.

12. Which of the following international standards are used to support EHR in a country? Please check all that apply

- ☐ CEN/TC 251
- ☐ ASTM International

- ☐ DCMI
  - ☐ DDI
  - ☐ DICOM
  - ☐ HL7
  - ☐ ICD
  - ☐ ISO TC 215
  - ☐ ISO 18308
  - ☐ IXF
  - ☐ LOINC
  - ☐ SDMX
  - ☐ SNOMED CT
  - ☐ Other. Please, elaborate \_\_\_\_\_
- 
- 

13. Does the country have the ability to provide patients with access to their own data contained in the EMR/EHR?

- ☐ Yes
- ☐ No
- ☐ I don't know

14. Does the integrated EMR/EHR function in the country?

- ☐ Yes (go to question 16)
- ☐ No
- ☐ I don't know

15. Do you plan to introduce integrated EMR/EHR in the country's healthcare in the near future?

- ☐ Yes (Please indicate the approximate date for putting the IEMR into operation \_\_\_\_\_)
- ☐ No

☐ I don't know

16. If there are additional comments on the topic covered in this section, please add them below:

---

---

---

### **Part 3 – Ensuring information security while using ICT in healthcare**

17. Has the country defined a national information security strategy?

☐ Yes (Please indicate the name of the document and the year of its entry into force  
\_\_\_\_\_)

☐ No

☐ I don't know

18. Does the country have legislation regulating the security of information and means of its processing?

☐ Yes (Please indicate the name of the document and the year of its entry into force  
\_\_\_\_\_)

☐ No

☐ I don't know

19. Has the country defined the procedure for confirming the compliance of information systems with the information protection requirements specified in the regulatory legal acts listed in clause 18?

☐ Yes

☐ No

☐ I don't know

20. Are there regulatory legal acts in the country that determine the procedure and rules for the safe processing of information containing personal data of an individual, information constituting personal and family secrets, as well as information regarding the health of an individual?

☐ Yes (Please indicate the name of the document and the year of its entry into force  
\_\_\_\_\_)

☐ No

☐ I don't know

21. Has the country defined the procedure for the cross-border transfer of personal data and information related to the health status of an individual?

☐ Yes (Please indicate the name of the document and the year of its entry into force \_\_\_\_\_)

☐ No

☐ I don't know

### **Information security regulation in healthcare**

22. Has the country defined an overall health information security strategy?

☐ Yes (Please indicate the name of the document and the year of its entry into force \_\_\_\_\_)

☐ No

☐ I don't know

23. Is Health Information Security Management System Implemented?

☐ Yes

☐ Yes, partially (please, indicate the processes for which the IS management processes have been implemented (are being developed, are planned for implementation in the near future)\_\_\_\_\_).

☐ No

☐ I don't know

24. Has the management structure for Health Information Security been defined?

☐ Yes

☐ No

☐ I don't know

25. Has a responsible Health Information Security unit been identified in the country's Health Information Security management structure?

☐ Yes (please, indicate the processes for which the IS management processes have been implemented (are being developed, are planned for implementation in the near future)  
\_\_\_\_\_)

☐ No

☐ I don't know

26. Have the rules for ensuring information security at the stages of the life cycle of an HIS have been defined?

☐ Yes

☐ No

☐ I don't know

27. Have the general requirements and rules for ensuring the security of information when processing it in a HIS have been defined at the level of the country's Ministry of Health?

☐ Yes

☐ No

☐ I don't know

28. Is information protection ensured in the information and telecommunication infrastructure of healthcare organizations, including, inter alia, information processing facilities that support networks?

☐ Yes

☐ No

☐ I don't know

29. Are the information and telecommunication infrastructures of healthcare organizations integrated into a single system (network) for transmitting healthcare data in the country?

☐ Yes

☐ No

☐ I don't know

30. Is information security incident management carried out in the country's healthcare?

☐ Yes

- ☐ No (go to question 32)
- ☐ I don't know (go to question 32)

31. At what level is the management of monitoring, processing and response to information security incidents carried out?

- ☐ National level (state level)
- ☐ Regional level (state region level)
- ☐ Level of healthcare organization

32. Does the country's healthcare system manage information security risks?

- ☐ Yes
- ☐ No (go to question 34)
- ☐ I don't know (go to question 34)

33. At what level is the management of security, compliance, risks Information security carried out?

- ☐ National level (state level)
- ☐ Regional level (state region level)
- ☐ Level of healthcare organization

34. If there are additional comments on the topic covered in this section, please add them below:

---

---

---

#### **Part 4 – Integration of National Health Information Systems**

35. Do you consider it appropriate to integrate national HIS of the CIS member states?

- ☐ Yes
- ☐ No. Please clarify why you think so? (after the answer, you can complete the survey)

---

---

---

36. How do you assess the possibility of integrating national HIS of the CIS member states from a technical point of view?

- ☐ Ready for integration at the technical level
- ☐ Integration is possible, but it will require a deep revision (modernization) of the national HIS, up to its replacement

37. How do you assess the possibility of integrating national HIS of the CIS member states from a legislative point of view?

- ☐ Ready for integration at the legislative level
- ☐ Integration is possible, but it will require the adoption of new national acts of legislation or the introduction of significant changes in existing

38. If there are additional comments on the topic covered in this section, please add them below:

---

---

---
